# Supplementary material for: Phenolic Rich Extract from Clinacanthus nutans Attenuates Hyperlipidemia‐Associated Oxidative Stress in Rats
Source: Hindawi journal article supplement (doi:10.1155/2016/4137908), 2016-01-01
Supplement: f1 [file 4137908.f1.pdf]

713

714 **Supplementary data**

715

716 **Food Composition of the Normal Pellet and High Fat and High Cholesterol (HFHC) Diet**

717

| <b>Food classes</b> | <b>Normal Pellet (%)</b> | <b>HFHC (%)</b> |
|---------------------|--------------------------|-----------------|
| Carbohydrates       | 60.0                     | 40.0            |
| Protein             | 25.0                     | 30.0            |
| Vitamin mix         | 5.0                      | 2.5             |
| Fats                | 5.0                      | 22.5            |
| Fibre               | 5.0                      | 2.5             |
| Cholesterol         | 0.0                      | 2.5             |

718

719

720

721
